# Supplementary material for: Health system performance at the district level in Indonesia after decentralization
Source: Springer Nature journal article supplement (doi:10.1186/1472-698x-10-3), 2010-03-05
Supplement: Additional file 3 [file 1472-698x-10-3-s3.pdf]

Additional File 3. Vaccination, childhood illness and contraception variables - estimated proportion, upper and lower limits of 95% confidence interval and un-weighted and weighted N, by district.

|                                                      | 2003        |       | UL   | Un-weighted N | Weighted N | 2007        |       | UL    | Un-weighted N | Weighted N |
|------------------------------------------------------|-------------|-------|------|---------------|------------|-------------|-------|-------|---------------|------------|
|                                                      | Proportion  | LL    |      |               |            | Proportion  | LL    |       |               |            |
| Mother has a vaccination card, seen by the interview |             |       |      |               |            |             |       |       |               |            |
| CJ: Cilacap                                          | <b>0.53</b> | 0.31  | 0.74 | 34            | 53         | <b>0.84</b> | 0.60  | 1.00† | 19            | 16         |
| CJ: Rembang                                          | <b>0.51</b> | 0.34  | 0.68 | 25            | 14         | <b>0.56</b> | 0.34  | 0.78  | 29            | 30         |
| CJ: Jepara                                           | <b>0.48</b> | 0.36  | 0.60 | 44            | 49         | <b>0.53</b> | 0.30  | 0.77  | 35            | 35         |
| CJ: Pemalang                                         | <b>0.35</b> | 0.15  | 0.54 | 36            | 41         | <b>0.50</b> | 0.28  | 0.73  | 26            | 26         |
| CJ: Brebes                                           | <b>0.58</b> | 0.43  | 0.72 | 45            | 74         | <b>0.59</b> | 0.42  | 0.75  | 29            | 31         |
| EJ: Trenggalek                                       | <b>0.47</b> | 0.13  | 0.81 | 21            | 12         | <b>0.88</b> | 0.77  | 1.00† | 19            | 13         |
| EJ: Jombang                                          | <b>0.43</b> | 0.16  | 0.70 | 28            | 29         | <b>0.42</b> | 0.13  | 0.72  | 23            | 23         |
| EJ: Ngawi                                            | <b>0.48</b> | 0.26  | 0.70 | 25            | 24         | <b>0.83</b> | 0.63  | 1.00† | 18            | 15         |
| EJ: Sampang                                          | <b>0.09</b> | 0.00† | 0.25 | 26            | 21         | <b>0.09</b> | 0.00† | 0.21  | 33            | 28         |
| EJ: Pamekasan                                        | <b>0.27</b> | 0.09  | 0.46 | 37            | 25         | <b>0.30</b> | 0.17  | 0.43  | 39            | 51         |
| Received all: BCG, 3 DPT, 3 Polio, & Measles         |             |       |      |               |            |             |       |       |               |            |
| CJ: Cilacap                                          | <b>0.50</b> | 0.29  | 0.71 | 34            | 53         | <b>0.84</b> | 0.60  | 1.00† | 19            | 16         |
| CJ: Rembang                                          | <b>0.36</b> | 0.10  | 0.62 | 25            | 14         | <b>0.42</b> | 0.23  | 0.60  | 29            | 30         |
| CJ: Jepara                                           | <b>0.21</b> | 0.07  | 0.36 | 44            | 49         | <b>0.37</b> | 0.16  | 0.58  | 35            | 35         |
| CJ: Pemalang                                         | <b>0.23</b> | 0.06  | 0.40 | 36            | 41         | <b>0.20</b> | 0.05  | 0.36  | 26            | 26         |
| CJ: Brebes                                           | <b>0.29</b> | 0.15  | 0.43 | 45            | 74         | <b>0.47</b> | 0.28  | 0.66  | 29            | 31         |
| EJ: Trenggalek                                       | <b>0.22</b> | 0.00† | 0.44 | 21            | 12         | <b>0.84</b> | 0.69  | 0.99  | 19            | 13 *       |
| EJ: Jombang                                          | <b>0.28</b> | 0.08  | 0.48 | 28            | 29         | <b>0.30</b> | 0.01  | 0.59  | 23            | 23         |
| EJ: Ngawi                                            | <b>0.37</b> | 0.18  | 0.56 | 25            | 24         | <b>0.83</b> | 0.63  | 1.00† | 18            | 15 *       |
| EJ: Sampang                                          | <b>0.09</b> | 0.00† | 0.25 | 26            | 21         | <b>0.07</b> | 0.00† | 0.16  | 33            | 28         |
| EJ: Pamekasan                                        | <b>0.14</b> | 0.01  | 0.26 | 37            | 25         | <b>0.29</b> | 0.15  | 0.42  | 39            | 51         |
| Doing something to avoid pregnancy                   |             |       |      |               |            |             |       |       |               |            |
| CJ: Cilacap                                          | <b>0.63</b> | 0.56  | 0.70 | 329           | 538        | <b>0.60</b> | 0.54  | 0.67  | 282           | 281        |
| CJ: Rembang                                          | <b>0.69</b> | 0.63  | 0.75 | 390           | 221        | <b>0.68</b> | 0.62  | 0.73  | 341           | 340        |
| CJ: Jepara                                           | <b>0.60</b> | 0.54  | 0.66 | 435           | 440        | <b>0.66</b> | 0.61  | 0.71  | 338           | 338        |
| CJ: Pemalang                                         | <b>0.52</b> | 0.47  | 0.58 | 474           | 528        | <b>0.59</b> | 0.53  | 0.65  | 333           | 332        |
| CJ: Brebes                                           | <b>0.63</b> | 0.58  | 0.68 | 440           | 749        | <b>0.65</b> | 0.60  | 0.71  | 293           | 293        |
| EJ: Trenggalek                                       | <b>0.59</b> | 0.55  | 0.64 | 527           | 357        | <b>0.72</b> | 0.62  | 0.81  | 295           | 297        |

|                                                                                 |             |      |       |     |     |             |      |       |     |       |
|---------------------------------------------------------------------------------|-------------|------|-------|-----|-----|-------------|------|-------|-----|-------|
| EJ: Jombang                                                                     | <b>0.71</b> | 0.65 | 0.76  | 367 | 415 | <b>0.69</b> | 0.63 | 0.75  | 292 | 292   |
| EJ: Ngawi                                                                       | <b>0.69</b> | 0.63 | 0.76  | 369 | 338 | <b>0.73</b> | 0.64 | 0.82  | 264 | 269   |
| EJ: Sampang                                                                     | <b>0.45</b> | 0.35 | 0.54  | 435 | 343 | <b>0.58</b> | 0.51 | 0.65  | 301 | 291   |
| EJ: Pamekasan                                                                   | <b>0.38</b> | 0.32 | 0.45  | 540 | 362 | <b>0.62</b> | 0.53 | 0.72  | 362 | 359 * |
| Using modern contraceptive methods, among those using any method                |             |      |       |     |     |             |      |       |     |       |
| CJ: Cilacap                                                                     | <b>0.92</b> | 0.86 | 0.98  | 202 | 339 | <b>0.92</b> | 0.85 | 0.99  | 167 | 170   |
| CJ: Rembang                                                                     | <b>0.98</b> | 0.97 | 1.00† | 271 | 152 | <b>0.97</b> | 0.95 | 0.99  | 232 | 231   |
| CJ: Jepara                                                                      | <b>0.96</b> | 0.94 | 0.99  | 253 | 265 | <b>0.97</b> | 0.96 | 0.99  | 223 | 223   |
| CJ: Pemalang                                                                    | <b>0.98</b> | 0.95 | 1.00† | 247 | 277 | <b>0.99</b> | 0.97 | 1.00† | 196 | 195   |
| CJ: Brebes                                                                      | <b>0.98</b> | 0.97 | 1.00† | 279 | 471 | <b>0.97</b> | 0.94 | 1.00  | 192 | 191   |
| EJ: Trenggalek                                                                  | <b>0.91</b> | 0.86 | 0.95  | 296 | 212 | <b>0.94</b> | 0.90 | 0.97  | 200 | 213   |
| EJ: Jombang                                                                     | <b>0.96</b> | 0.93 | 0.98  | 245 | 293 | <b>0.98</b> | 0.96 | 1.00  | 204 | 202   |
| EJ: Ngawi                                                                       | <b>0.98</b> | 0.96 | 1.00† | 254 | 234 | <b>0.97</b> | 0.94 | 0.99  | 199 | 196   |
| EJ: Sampang                                                                     | <b>0.89</b> | 0.85 | 0.92  | 185 | 153 | <b>0.97</b> | 0.93 | 1.00† | 160 | 169 * |
| EJ: Pamekasan                                                                   | <b>1.00</b> | 0.99 | 1.00† | 196 | 139 | <b>0.91</b> | 0.85 | 0.97  | 216 | 224 * |
| Modern methods obtained at private medical sector, among those using the method |             |      |       |     |     |             |      |       |     |       |
| CJ: Cilacap                                                                     | <b>0.59</b> | 0.52 | 0.66  | 183 | 313 | <b>0.73</b> | 0.66 | 0.79  | 151 | 157 * |
| CJ: Rembang                                                                     | <b>0.51</b> | 0.42 | 0.60  | 267 | 150 | <b>0.69</b> | 0.57 | 0.80  | 226 | 223   |
| CJ: Jepara                                                                      | <b>0.86</b> | 0.78 | 0.94  | 243 | 255 | <b>0.88</b> | 0.83 | 0.94  | 217 | 217   |
| CJ: Pemalang                                                                    | <b>0.75</b> | 0.65 | 0.84  | 240 | 270 | <b>0.87</b> | 0.83 | 0.91  | 192 | 193   |
| CJ: Brebes                                                                      | <b>0.74</b> | 0.63 | 0.84  | 275 | 464 | <b>0.75</b> | 0.66 | 0.84  | 186 | 185   |
| EJ: Trenggalek                                                                  | <b>0.56</b> | 0.49 | 0.62  | 271 | 192 | <b>0.67</b> | 0.60 | 0.75  | 186 | 199   |
| EJ: Jombang                                                                     | <b>0.68</b> | 0.55 | 0.81  | 232 | 281 | <b>0.79</b> | 0.73 | 0.86  | 199 | 197   |
| EJ: Ngawi                                                                       | <b>0.56</b> | 0.47 | 0.65  | 251 | 230 | <b>0.75</b> | 0.69 | 0.81  | 193 | 189 * |
| EJ: Sampang                                                                     | <b>0.61</b> | 0.47 | 0.74  | 164 | 136 | <b>0.60</b> | 0.39 | 0.81  | 155 | 164   |
| EJ: Pamekasan                                                                   | <b>0.69</b> | 0.57 | 0.80  | 195 | 138 | <b>0.63</b> | 0.45 | 0.80  | 203 | 204   |

LL: Lower Limit, UL: Upper Limit, CJ: Central Java, EJ: East Java

\* Significant difference base on 95% confidence intervals
